# Supplementary material
Source: PubMed Central journal article supplement (PMC5690842)
Supplement: NIHMS898225-supplement-supplement_1.pdf [file NIHMS898225-supplement-supplement_1.pdf]

**Supplement Appendix:  
Original Alcohol Use Measures Used to Define Drinking Categories**

The next questions are about **ALCOHOLIC BEVERAGES**, including beer, wine, liquor, and any other beverage that contains alcohol.

11. On how many occasions (if any) have you had any alcoholic beverage to drink—more than just a few sips...  
(Mark one circle for each line.)

- |                                        |             |               |               |               |                 |                 |            |
|----------------------------------------|-------------|---------------|---------------|---------------|-----------------|-----------------|------------|
|                                        | 0 Occasions | 1-2 Occasions | 3-5 Occasions | 6-9 Occasions | 10-19 Occasions | 20-39 Occasions | 40 or More |
| a. ...in your lifetime? . . . . .      | 1           | 2             | 3             | 4             | 5               | 6               | 7          |
| b. ...during the last 12 months? . .   | 1           | 2             | 3             | 4             | 5               | 6               | 7          |
| c. ...during the last 30 days? . . . . | 1           | 2             | 3             | 4             | 5               | 6               | 7          |

IF YOU HAVE NOT HAD ANY BEER, WINE, LIQUOR, OR OTHER ALCOHOLIC BEVERAGE IN THE LAST TWELVE MONTHS, GO TO QUESTION 21.

[questions 11 thru 16 not shown]

The following questions ask about how much you have to drink on the occasions when you drink alcoholic beverages. For these questions, a "drink" means any of the following:

- A 12-ounce can (or bottle) of beer
- A 4-ounce glass of wine
- A 12-ounce bottle (or can) of wine cooler
- A mixed drink, shot glass of liquor, or the equivalent

17. During the last two weeks, how many times (if any) have you had five or more drinks in a row?

- |         |                    |
|---------|--------------------|
| 1 None  | 4 3 to 5 times     |
| 2 Once  | 5 6 to 9 times     |
| 3 Twice | 6 10 or more times |

18. During the last two weeks, how many times (if any) have you had 10 or more drinks in a row?

- |         |                    |
|---------|--------------------|
| 1 None  | 4 3 to 5 times     |
| 2 Once  | 5 6 to 9 times     |
| 3 Twice | 6 10 or more times |

19. During the last two weeks, how many times (if any) have you had 15 or more drinks in a row?

- |         |                    |
|---------|--------------------|
| 1 None  | 4 3 to 5 times     |
| 2 Once  | 5 6 to 9 times     |
| 3 Twice | 6 10 or more times |
